# Supplementary material for: Frequency of Important CYP450 Enzyme Gene Polymorphisms in the Iranian Population in Comparison with Other Major Populations: A Comprehensive Review of the Human Data
Source: MDPI journal article supplement (doi:10.3390/jpm11080804), 2021-08-18
Supplement: s1 [file s1]

**Table S1.** Important variant and allele frequencies of the human CYP1A2 gene

| Important variant and allele frequencies of the human <i>CYP1A2</i> gene |                   |              |                                                |      |      |      |      |      |                        |
|--------------------------------------------------------------------------|-------------------|--------------|------------------------------------------------|------|------|------|------|------|------------------------|
| Allele                                                                   | Defining variants | Variant type | Allele frequencies in indicated populations, % |      |      |      |      |      | Functional consequence |
|                                                                          |                   |              | EUR                                            | AMR  | AFR  | EAS  | SAS  | IRN  |                        |
| <b>*1</b>                                                                |                   |              | 29.8                                           | 28.7 | 39.9 | 34.2 | 41.3 | 39.8 | Normal                 |
| <b>*1F</b>                                                               | rs762551          | 5' UTR       | 69.9                                           | 71.3 | 60.1 | 64.9 | 57.7 | 59.9 | Increased              |
| <b>*1K</b>                                                               | rs12720461        | 5' UTR       | 0.2                                            | 0    | 0    | 0    | 0.3  | 0    | Decreased              |
| <b>*2</b>                                                                | rs56160784        | (F21L)*      | 0                                              | 0    | 0    | 0.2  | 0    | 0    | Not clear              |
| <b>*3</b>                                                                | rs56276455        | (D348N)*     | 0                                              | 0    | 0    | 0    | 0    | 0    | Decreased              |
| <b>*6</b>                                                                | rs28399424        | (R431W)*     | 0.1                                            | 0    | 0    | 0    | 0    | 0    | Inactive               |
| <b>*7</b>                                                                | rs56107638        | **           | 0                                              | 0    | 0    | 0    | 0    | 0    | Decreased              |
| <b>*8</b>                                                                | rs72547517        | (R456H)*     | 0                                              | 0    | 0    | 0    | 0    | 0    | Decreased              |
| <b>*9</b>                                                                | rs138652540       | (T83M)*      | 0                                              | 0    | 0    | 0    | 0    | 0    | Not clear              |
| <b>*10</b>                                                               | rs72547512        | (E168Q)*     | 0                                              | 0    | 0    | 0    | 0    | 0    | Not clear              |
| <b>*11</b>                                                               | rs72547513        | (F186L)*     | 0                                              | 0    | 0    | 0    | 0    | 0    | Decreased              |
| <b>*13</b>                                                               | rs35796837        | (G299S)*     | 0                                              | 0    | 0    | 0.4  | 0.7  | 0.3  | Not clear              |
| <b>*14</b>                                                               | rs45486893        | (T438I)*     | 0                                              | 0    | 0    | 0.3  | 0    | 0    | Not clear              |
| <b>*16</b>                                                               | rs72547515        | (R377Q)*     | 0                                              | 0    | 0    | 0    | 0    | 0    | Decreased              |

\*: Missense

\*\*: Splicing defect

**Table S2.** Important variant and allele frequencies of the human CYP2B6 gene

| <b>Important variant and allele frequencies of the human <i>CYP2B6</i> gene</b> |                                        |                                  |            |            |            |            |            |            |                               |
|---------------------------------------------------------------------------------|----------------------------------------|----------------------------------|------------|------------|------------|------------|------------|------------|-------------------------------|
| <b>Allele frequencies in indicated populations, %</b>                           |                                        |                                  |            |            |            |            |            |            |                               |
| <b>Allele</b>                                                                   | <b>Defining variants</b>               | <b>Variant type</b>              | <b>EUR</b> | <b>AMR</b> | <b>AFR</b> | <b>EAS</b> | <b>SAS</b> | <b>IRN</b> | <b>Functional consequence</b> |
| <b>*1</b>                                                                       | None                                   |                                  | 41.3       | 38.5       | 9.8        | 57.6       | 6.5        | 54.7       | Normal                        |
| <b>*2</b>                                                                       | rs8192709                              | (R22C)*                          | 5.6        | 3.1        | 3.7        | 4.5        | 3.0        | 5.3        | Normal                        |
| <b>*3</b>                                                                       | rs45482602                             | (S259R)*                         | 0.2        | 0.1        | 0          | 0          | 0.2        | 1.3        | Not clear                     |
| <b>*4</b>                                                                       | rs2279343                              | (K262R)*                         | 10.7       | 17         | 24         | 15.4       | 25.1       | 0          | Increased                     |
| <b>*5</b>                                                                       | rs3211371                              | (R487C)*                         | 11.8       | 4.4        | 2.6        | 0.1        | 8          | 8.5        | Normal                        |
| <b>*6</b>                                                                       | rs2279343<br>rs3745274                 | (K262R)*<br>(Q172H)*             | 3.4        | 3          | 5.8        | 2.7        | 15.8       | 0          | Decreased                     |
| <b>*7</b>                                                                       | rs2279343<br>rs3745274<br>rs3211371    | (K262R)*<br>(Q172H)*<br>(R487C)* | 0          | 0          | 0          | 0          | 0          | 0          | Decreased                     |
| <b>*8</b>                                                                       | rs12721655                             | (K139E)*                         | 0.4        | 0.1        | 0          | 0          | 0          | 0          | Inactive                      |
| <b>*9</b>                                                                       | rs3745274                              | (Q172H)*                         | 24         | 31.4       | 37         | 19         | 38.9       | 26.6       | Decreased                     |
| <b>*10</b>                                                                      | rs8192709<br>rs34883432                | (R22C)*<br>(Q21L)*               | 0          | 0.3        | 0          | 0          | 0.1        | 0          | Not clear                     |
| <b>*11</b>                                                                      | rs35303484                             | (M46V)*                          | 0.3        | 0.1        | 0          | 0          | 0.2        | 0.6        | Not clear                     |
| <b>*12</b>                                                                      | rs36060847                             | (G99E)*                          | 0          | 0          | 0          | 0          | 0          | 0          | Inactive                      |
| <b>*13</b>                                                                      | rs2279343<br>rs3745274<br>rs12721655   | (K262R)*<br>(Q172H)*<br>(K139E)* | 0          | 0          | 0          | 0          | 0          | 0          | Inactive                      |
| <b>*14</b>                                                                      | rs35773040                             | (R140Q)*                         | 0.5        | 0          | 0          | 0          | 0.3        | 0.3        | Not clear                     |
| <b>*15</b>                                                                      | rs35979566                             | (I391N)*                         | 0.7        | 0.1        | 0.2        | 0          | 0          | 0.1        | Not clear                     |
| <b>*16</b>                                                                      | rs2279343<br>rs28399499                | (I328T)*                         | 0          | 0.3        | 6.5        | 0          | 0          | 0          | Decreased                     |
| <b>*17</b>                                                                      | rs33973337<br>rs33980385<br>rs33926104 | (T26S)*<br>(D28G)*<br>(R29T)*    | 0          | 0          | 0          | 0          | 0          | 0          | Normal                        |
| <b>*18</b>                                                                      | rs28399499                             | (I328T)*                         | 0          | 0.3        | 7          | 0          | 0          | 0          | Decreased                     |
| <b>*19</b>                                                                      | rs34826503                             | (R336C)*                         | 0          | 0          | 0.2        | 0          | 0          | 0          | Inactive                      |
| <b>*20</b>                                                                      | rs36056539                             | (T168I)*                         | 0          | 0          | 0.2        | 0          | 0          | 0          | Decreased                     |
| <b>*21</b>                                                                      | rs35010098                             | (P428T)*                         | 0          | 0          | 0          | 0          | 0          | 0          | Not clear                     |
| <b>*22</b>                                                                      | rs34223104                             | Regulatory                       | 1.1        | 1.3        | 2.8        | 0.2        | 1.8        | 2.6        | Increased                     |
| <b>*23</b>                                                                      | rs3211369                              | (M459V)*                         | 0          | 0          | 0          | 0          | 0          | 0          | Not clear                     |
| <b>*26</b>                                                                      | rs2279343<br>rs3745274<br>rs3826711    | (K262R)*<br>(Q172H)*<br>(P167A)* | 0          | 0          | 0          | 0.5        | 0          | 0          | Decreased                     |
| <b>*27</b>                                                                      | rs36079186                             | (M198T)**                        | 0          | 0          | 0.2        | 0          | 0.1        | 0          | Not clear                     |
| <b>*28</b>                                                                      | rs34097093                             | (R378X)                          | 0          | 0          | 0          | 0          | 0          | 0          | Inactive                      |

\*: Missense

\*\*: Stop-gain

**Table S3.** Important variant and allele frequencies of the human CYP2C8 gene

| <b>Important variant and allele frequencies of the human <i>CYP2C8</i> gene</b> |                           |                      |            |            |            |            |            |            |                               |
|---------------------------------------------------------------------------------|---------------------------|----------------------|------------|------------|------------|------------|------------|------------|-------------------------------|
| <b>Allele frequencies in indicated populations, %</b>                           |                           |                      |            |            |            |            |            |            |                               |
| <b>Allele</b>                                                                   | <b>Defining variants</b>  | <b>Variant type</b>  | <b>EUR</b> | <b>AMR</b> | <b>AFR</b> | <b>EAS</b> | <b>SAS</b> | <b>IRN</b> | <b>Functional consequence</b> |
| <b>*1</b>                                                                       | None                      |                      | 83.1       | 89.8       | 81.6       | 99         | 92.6       | 95         | Normal                        |
| <b>*2</b>                                                                       | rs11572103                | (I269F)*             | 0.3        | 0.8        | 15.2       | 0          | 1.9        | 2.3        | Decreased                     |
| <b>*3</b>                                                                       | rs10509681,<br>rs11572080 | (K399R)*<br>(R139K)* | 11.2       | 6.7        | 2.1        | 0          | 4          | 0          | Decreased                     |
| <b>*4</b>                                                                       | rs1058930                 | (I264M)*             | 5.4        | 2.7        | 1.1        | 0          | 1.5        | 2.6        | Decreased                     |
| <b>*5</b>                                                                       | rs72558196                | Frameshift           | 0          | 0          | 0          | 0          | 0          | 0          | Inactive                      |
| <b>*6</b>                                                                       | rs142886225               | (G171S)*             | 0          | 0          | 0          | 0.5        | 0          | 0.1        | Normal                        |
| <b>*7</b>                                                                       | rs72558195                | (R186X)**            | 0          | 0          | 0          | 0          | 0          | 0          | Inactive                      |
| <b>*11</b>                                                                      | rs78637571                | (E274X)**            | 0          | 0          | 0          | 0.3        | 0          | 0          | Inactive                      |
| <b>*12</b>                                                                      | rs3832694                 | (461delV)***         | 0          | 0          | 0          | 0          | 0          | 0          | Not clear                     |
| <b>*14</b>                                                                      | rs188934928               | (A238P)*             | 0          | 0          | 0          | 0.2        | 0          | 0          | Decreased                     |

\*: Missense

\*\*: Stop-gain

\*\*\*: Inframe deletion

**Table S4.** Important variant and allele frequencies of the human CYP2C9 gene

| Important variant and allele frequencies of the human <i>CYP2C9</i> gene |                   |              |      |      |      |      |      |      |                        |
|--------------------------------------------------------------------------|-------------------|--------------|------|------|------|------|------|------|------------------------|
| Allele frequencies in indicated populations, %                           |                   |              |      |      |      |      |      |      |                        |
| Allele                                                                   | Defining variants | Variant type | EUR  | AMR  | AFR  | EAS  | SAS  | IRN  | Functional consequence |
| *1                                                                       | None              |              | 80.2 | 88.8 | 79.1 | 96.3 | 82.4 | 78.1 | Normal                 |
| *2                                                                       | rs1799853         | (R144C)*     | 12.6 | 6.8  | 2.1  | 0    | 4.6  | 10.5 | Decreased              |
| *3                                                                       | rs1057910         | (I359L)*     | 6.8  | 3.8  | 1.2  | 3.3  | 11   | 10.2 | Decreased              |
| *4                                                                       | rs56165452        | (I359T)*     | 0    | 0    | 0    | 0    | 0    | 0    | Decreased              |
| *5                                                                       | rs28371686        | (D360E)*     | 0    | 0    | 1.1  | 0    | 0    | 0    | Decreased              |
| *6                                                                       | rs9332131         | Frameshift   | 0    | 0    | 1    | 0    | 0    | 0    | Inactive               |
| *7                                                                       | rs67807361        | (L19I)*      | 0    | 0    | 0    | 0    | 0    | 0    | Not clear              |
| *8                                                                       | rs7900194         | (R150H)*     | 0    | 0.2  | 5.9  | 0    | 0    | 0.1  | Decreased              |
| *9                                                                       | rs2256871         | (H251R)*     | 0    | 0.2  | 7.5  | 0    | 0    | 0.3  | Normal                 |
| *11                                                                      | rs28371685        | (R335W)*     | 0.2  | 0.1  | 1.9  | 0    | 0.2  | 0.1  | Decreased              |
| *12                                                                      | rs9332239         | (P489S)*     | 0.2  | 0.1  | 0    | 0    | 0    | 0.1  | Decreased              |
| *13                                                                      | rs72558187        | (L90P)*      | 0    | 0    | 0    | 0.1  | 0    | 0    | Decreased              |
| *14                                                                      | rs72558189        | (R125H)*     | 0    | 0    | 0    | 0    | 1.8  | 0.1  | Not clear              |
| *15                                                                      | rs72558190        | (S162X)**    | 0    | 0    | 0    | 0    | 0    | 0    | Inactive               |
| *16                                                                      | rs72558192        | (T299A)*     | 0    | 0    | 0    | 0.3  | 0    | 0    | Not clear              |
| *29                                                                      | rs182132442       | (P279T)*     | 0    | 0    | 0    | 0.1  | 0    | 0.4  | Not clear              |
| *30                                                                      | rs781583846       | (A477T)*     | 0    | 0    | 0    | 0    | 0    | 0    | Not clear              |
| *31                                                                      | rs57505750        | (I327T)*     | 0    | 0    | 0    | 0    | 0    | 0    | Decreased              |
| *33                                                                      | rs200183364       | (R132Q)*     | 0    | 0    | 0    | 0    | 0    | 0.1  | Not clear              |
| *36                                                                      | rs114071557       | Start lost   | 0    | 0    | 0.2  | 0    | 0    | 0    | Not clear              |
| *42                                                                      | rs12414460        | (R124Q)*     | 0    | 0    | 0    | 0    | 0    | 0    | Not clear              |
| *44                                                                      | rs200965026       | (T130M)*     | 0    | 0    | 0    | 0    | 0    | 0    | Not clear              |
| *45                                                                      | rs199523631       | (R132W)*     | 0    | 0    | 0    | 0    | 0    | 0    | Not clear              |

\*: Missense

\*\*: Stop-gain

**Table S5.** Important variant and allele frequencies of the human *CYP2C19* gene

| <b>Important variant and allele frequencies of the human <i>CYP2C19</i> gene</b> |                          |                     |            |             |            |            |            |            |                               |
|----------------------------------------------------------------------------------|--------------------------|---------------------|------------|-------------|------------|------------|------------|------------|-------------------------------|
| <b>Allele frequencies in indicated populations, %</b>                            |                          |                     |            |             |            |            |            |            |                               |
| <b>Allele</b>                                                                    | <b>Defining variants</b> | <b>Variant type</b> | <b>EUR</b> | <b>AM R</b> | <b>AFR</b> | <b>EAS</b> | <b>SAS</b> | <b>IRN</b> | <b>Functional consequence</b> |
| <b>*1</b>                                                                        | None                     |                     | 62.1       | 79.1        | 48.5       | 62.4       | 67.3       | 85.8       | Normal                        |
| <b>*2</b>                                                                        | rs4244285                | **                  | 14.6       | 10.1        | 17.7       | 30.7       | 32.4       | 13.1       | Inactive                      |
| <b>*3</b>                                                                        | rs4986893                | (W212X)#            | 0          | 0           | 0          | 6.2        | 0.3        | 0.3        | Inactive                      |
| <b>*4</b>                                                                        | rs28399504               | Start lost          | 0          | 0.2         | 0          | 0          | 0          | 0          | Inactive                      |
| <b>*5</b>                                                                        | rs56337013               | (R433W)*            | 0          | 0           | 0          | 0          | 0          | 0          | Inactive                      |
| <b>*6</b>                                                                        | rs72552267               | (R132Q)*            | 0          | 0           | 0          | 0          | 0          | 0          | Inactive                      |
| <b>*7</b>                                                                        | rs72558186               | **                  | 0          | 0           | 0          | 0          | 0          | 0          | Inactive                      |
| <b>*8</b>                                                                        | rs41291556               | (W120R)*            | 0.2        | 0           | 0          | 0          | 0          | 0.2        | Inactive                      |
| <b>*9</b>                                                                        | rs17884712               | (R144H)*            | 0          | 0           | 1.2        | 0          | 0          | 0          | Decreased                     |
| <b>*10</b>                                                                       | rs6413438                | (P227L)*            | 0          | 0           | 0.3        | 0          | 0          | 0          | Decreased                     |
| <b>*12</b>                                                                       | rs55640102               | (X491C) ***         | 0          | 0           | 0.1        | 0          | 0          | 0          | Not clear                     |
| <b>*13</b>                                                                       | rs17879685               | (R410C)*            | 0          | 0           | 1.7        | 0          | 0          | 0          | Normal                        |
| <b>*15</b>                                                                       | rs17882687               | (I19L)*             | 0          | 0           | 1.8        | 0          | 0          | 0.1        | Normal                        |
| <b>*16</b>                                                                       | rs192154563              | (R442C)*            | 0          | 0           | 0          | 0          | 0          | 0          | Decreased                     |
| <b>*17</b>                                                                       | rs12248560               | Regulatory          | 23.1       | 10          | 20.9       | 0.7        | NA         | NA         | Increased                     |
| <b>*22</b>                                                                       | rs140278421              | (R186P)*            | 0          | 0           | 0.1        | 0          | 0          | 0          | Inactive                      |
| <b>*23</b>                                                                       | rs118203756              | (G91R)*             | 0          | 0           | 0          | 0          | 0          | 0          | Not clear                     |
| <b>*24</b>                                                                       | rs118203757              | (R335Q)*            | 0          | 0           | 0          | 0          | 0          | 0.5        | Inactive                      |
| <b>*25</b>                                                                       | rs118203759              | (F448L)*            | 0          | 0           | 0          | 0          | 0          | 0          | Decreased                     |
| <b>*27</b>                                                                       | rs7902257                | Regulatory          | 0          | 0.6         | 7.7        | 0          | 0          | 0          | Decreased                     |

\*: Missense

\*\*: Splicing defect

\*\*\*: Stop-lost

#: Stop-gain

NA: Not Available (Data not found)

**Table S6.** Important variant and allele frequencies of the human CYP2D6 gene

| <b>Important variant and allele frequencies of the human <i>CYP2D6</i> gene</b> |                                            |                                              |            |            |            |            |            |            |                               |
|---------------------------------------------------------------------------------|--------------------------------------------|----------------------------------------------|------------|------------|------------|------------|------------|------------|-------------------------------|
| <b>Allele frequencies in indicated populations, %</b>                           |                                            |                                              |            |            |            |            |            |            |                               |
| <b>Allele</b>                                                                   | <b>Defining variants</b>                   | <b>Variant type</b>                          | <b>EUR</b> | <b>AMR</b> | <b>AFR</b> | <b>EAS</b> | <b>SAS</b> | <b>IRN</b> | <b>Functional consequence</b> |
| <b>*1</b>                                                                       | None                                       |                                              | 21.9       | 44.5       | 14.4       | 14.1       | 27.6       | 10.6       | Normal                        |
| <b>*1xN</b>                                                                     | Amplification of *1                        |                                              | 1          | 0.5        | 3.3        | 1          | 0.5        | NA         | Increased                     |
| <b>*2</b>                                                                       | rs16947, rs1135840                         | (R296C)*<br>(S486T)*                         | 34.3       | 32.7       | 26.7       | 14         | 36.2       | 47         | Normal                        |
| <b>*2xN</b>                                                                     | Amplification of *2                        |                                              | 1.3        | 0.5        | 6          | 1          | 1          | NA         | Increased                     |
| <b>*3</b>                                                                       | rs35742686                                 | Frameshift                                   | 4.7        | 0.4        | 0.2        | 0          | 0.1        | 0.3        | Inactive                      |
| <b>*4</b>                                                                       | rs3892097                                  | #                                            | 19.6       | 11.1       | 8          | 0.3        | 10.3       | 11.2       | Inactive                      |
| <b>*5</b>                                                                       | CYP2D6 deleted                             |                                              | 3          | 3          | 4          | 6.5        | 2          | NA         | Inactive                      |
| <b>*6</b>                                                                       | rs5030655                                  | Frameshift                                   | 1          | 0.3        | 0.2        | 0          | 0.1        | 0.5        | Inactive                      |
| <b>*7</b>                                                                       | rs5030867                                  | (H324P)*                                     | 0          | 0          | 0          | 0          | 0.8        | 0.3        | Inactive                      |
| <b>*8</b>                                                                       | rs5030865                                  | (G169X)**                                    | 0          | 0          | 0          | 0          | 0          | 0          | Inactive                      |
| <b>*9</b>                                                                       | rs5030656                                  | (K281del)***                                 | 2.5        | 1.2        | 0.3        | 0          | 0.2        | 0          | Decreased                     |
| <b>*10</b>                                                                      | rs1065852, rs1135840                       | (P34S)*<br>(S486T)*                          | 0.2        | 0          | 3.2        | 58.7       | 6.5        | 15.1       | Decreased                     |
| <b>*11</b>                                                                      | rs201377835                                | #                                            | 0          | 0          | 0          | 0          | 0          | 0          | Inactive                      |
| <b>*12</b>                                                                      | rs5030862                                  | (G42R)*                                      | 0          | 0          | 0          | 0          | 0          | 0.2        | Inactive                      |
| <b>*14</b>                                                                      | rs5030865                                  | (G169R)*                                     | 0          | 0          | 0          | 1.2        | 0          | 0          | Decreased                     |
| <b>*17</b>                                                                      | rs16947, rs28371706                        | (R296C)*<br>(T107I)*                         | 0          | 0.7        | 19.7       | 0          | 0.1        | 0          | Decreased                     |
| <b>*29</b>                                                                      | rs16947, rs1135840, rs61736512, rs59421388 | (R296C)*<br>(S486T)*<br>(V136I)*<br>(V338M)* | 0          | 0.4        | 9.2        | 0          | 0          | 0          | Decreased                     |
| <b>*33</b>                                                                      | rs28371717                                 | (A237S)*                                     | 1.2        | 0.1        | 0.2        | 0          | 0.6        | 0.8        | Normal                        |
| <b>*41</b>                                                                      | rs28371725                                 | #                                            | 9.3        | 4          | 2.6        | 3.2        | 13.5       | 14         | Decreased                     |
| <b>*42</b>                                                                      | rs72549346                                 | Frameshift                                   | 0          | 0          | 0.2        | 0          | 0          | 0          | Inactive                      |
| <b>*43</b>                                                                      | rs28371696                                 | (R26H)*                                      | 0          | 0.1        | 1.8        | 0          | 0.5        | 0          | Not clear                     |
| <b>*53</b>                                                                      | rs1135822, rs1135823                       | (F120I)*<br>(A122S)*                         | 0          | 0.5        | 0          | 0          | 0          | 0          | Normal                        |
| <b>*62</b>                                                                      | rs730882171                                | (R441C)*                                     | 0          | 0          | 0          | 0          | 0          | 0          | Inactive                      |

\*: Missense

\*\*: Stop-gain

\*\*\*: Inframe deletion

#: Splicing defect

NA: Not Available (Data not found)

**Table S7.** Important variant and allele frequencies of the human CYP2E1 gene

| <b>Important variant and allele frequencies of the human <i>CYP2E1</i> gene</b> |                          |                     |            |            |            |            |            |            |                               |
|---------------------------------------------------------------------------------|--------------------------|---------------------|------------|------------|------------|------------|------------|------------|-------------------------------|
| <b>Allele frequencies in indicated populations, %</b>                           |                          |                     |            |            |            |            |            |            |                               |
| <b>Allele</b>                                                                   | <b>Defining variants</b> | <b>Variant type</b> | <b>EUR</b> | <b>AMR</b> | <b>AFR</b> | <b>EAS</b> | <b>SAS</b> | <b>IRN</b> | <b>Functional consequence</b> |
| <b>*1</b>                                                                       | None                     |                     | 93.5       | 86.1       | 79.2       | 79.4       | 97.2       | 94.1       | Normal                        |
| <b>*2</b>                                                                       | rs72559710               | (R76H)*             | 0          | 0          | 0          | 0.4        | 0          | 0          | Decreased                     |
| <b>*3</b>                                                                       | rs55897648               | (V389I)*            | 0.2        | 0          | 0          | 0          | 0          | 0.3        | Normal                        |
| <b>*4</b>                                                                       | rs6413419                | (V179I)*            | 2.2        | 2.4        | 20.6       | 0          | 1.9        | 5.6        | Normal                        |
| <b>*5</b>                                                                       | rs3813867,<br>rs2031920  | 5' UTR              | 4.1        | 11.5       | 0.2        | 20.2       | 0.9        | 0          | Not clear                     |

\*: Missense

**Table S8.** Important variant and allele frequencies of the human CYP3A4 gene

| <b>Important variant and allele frequencies of the human <i>CYP3A4</i> gene</b> |                          |                     |            |            |            |            |            |            |                               |
|---------------------------------------------------------------------------------|--------------------------|---------------------|------------|------------|------------|------------|------------|------------|-------------------------------|
| <b>Allele frequencies in indicated populations, %</b>                           |                          |                     |            |            |            |            |            |            |                               |
| <b>Allele</b>                                                                   | <b>Defining variants</b> | <b>Variant type</b> | <b>EUR</b> | <b>AMR</b> | <b>AFR</b> | <b>EAS</b> | <b>SAS</b> | <b>IRN</b> | <b>Functional consequence</b> |
| <b>*1</b>                                                                       | None                     |                     | 94.4       | 97.2       | 96.9       | 97.3       | 99.8       | 99.7       | Normal                        |
| <b>*2</b>                                                                       | rs55785340               | (S222P)*            | 0          | 0          | 0          | 0          | 0          | 0          | Not clear                     |
| <b>*3</b>                                                                       | rs4986910                | (M445T)*            | 0.7        | 0.1        | 0          | 0          | 0          | 0.1        | Not clear                     |
| <b>*4</b>                                                                       | rs55951658               | (I118V)*            | 0          | 0          | 0          | 0.5        | 0          | 0          | Not clear                     |
| <b>*5</b>                                                                       | rs55901263               | (P218R)*            | 0          | 0          | 0          | 0.1        | 0          | 0          | Not clear                     |
| <b>*6</b>                                                                       | rs4646438                | Frameshift          | 0          | 0          | 0          | 0.2        | 0          | 0          | Not clear                     |
| <b>*7</b>                                                                       | rs56324128               | (G56D)*             | 0.1        | 0          | 0          | 0          | 0          | 0          | Not clear                     |
| <b>*8</b>                                                                       | rs72552799               | (R130Q)*            | 0.1        | 0          | 0          | 0          | 0          | 0          | Decreased                     |
| <b>*9</b>                                                                       | rs72552798               | (V170I)*            | 0          | 0          | 0          | 0          | 0          | 0          | Not clear                     |
| <b>*10</b>                                                                      | rs4986908                | (D174H)*            | 0.3        | 0          | 0.1        | 0          | 0.1        | 0          | Not clear                     |
| <b>*11</b>                                                                      | rs67784355               | (T363M)*            | 0          | 0          | 0          | 0          | 0          | 0.2        | Decreased                     |
| <b>*12</b>                                                                      | rs12721629               | (L373F)*            | 0          | 0          | 0.3        | 0          | 0          | 0          | Decreased                     |
| <b>*13</b>                                                                      | rs4986909                | (P416L)*            | 0          | 0          | 0          | 0          | 0          | 0          | Decreased                     |
| <b>*15</b>                                                                      | rs4986907                | (R162Q)*            | 0          | 0.2        | 2.6        | 0          | 0          | 0          | Not clear                     |
| <b>*16</b>                                                                      | rs12721627               | (T185S)*            | 0          | 0          | 0          | 0          | 0          | 0          | Decreased                     |
| <b>*18</b>                                                                      | rs28371759               | (L293P)*            | 0          | 0          | 0.1        | 1.9        | 0          | 0          | Decreased                     |
| <b>*19</b>                                                                      | rs4986913                | (P467S)*            | 0          | 0          | 0          | 0          | 0.1        | 0          | Not clear                     |
| <b>*20</b>                                                                      | rs67666821               | Frameshift          | 0          | 0.1        | 0          | 0          | 0          | 0          | Inactive                      |
| <b>*22</b>                                                                      | rs35599367               | Intronic            | 4.4        | 2.4        | 0          | 0          | 0          | 0          | Decreased                     |
| <b>*26</b>                                                                      | rs138105638              | (R268X)**           | 0          | 0          | 0          | 0          | 0          | 0          | Inactive                      |

\*: Missense

\*\*: Stop-gain



**Table S9.** Important variant and allele frequencies of the human *CYP3A5* gene

| <b>Important variant and allele frequencies of the human <i>CYP3A5</i> gene</b> |                          |                     |            |            |            |            |            |            |                               |
|---------------------------------------------------------------------------------|--------------------------|---------------------|------------|------------|------------|------------|------------|------------|-------------------------------|
| <b>Allele frequencies in indicated populations, %</b>                           |                          |                     |            |            |            |            |            |            |                               |
| <b>Allele</b>                                                                   | <b>Defining variants</b> | <b>Variant type</b> | <b>EUR</b> | <b>AMR</b> | <b>AFR</b> | <b>EAS</b> | <b>SAS</b> | <b>IRN</b> | <b>Functional consequence</b> |
| <b>*1</b>                                                                       | None                     |                     | 6.4        | 20.6       | 45.9       | 27.1       | 31.2       | 3.8        | Normal                        |
| <b>*2</b>                                                                       | rs28365083               | (T398N)*            | 0.6        | 0.1        | 0.1        | 0          | 0          | 0          | Not clear                     |
| <b>*3</b>                                                                       | rs776746                 | #                   | 93         | 78.2       | 31         | 71.8       | 68.8       | 96.1       | Inactive                      |
| <b>*4</b>                                                                       | rs56411402               | (Q200R)*            | 0          | 0          | 0          | 0.5        | 0          | 0          | Not clear                     |
| <b>*5</b>                                                                       | rs55965422               | #                   | 0          | 0          | 0          | 0.6        | 0          | 0          | Not clear                     |
| <b>*6</b>                                                                       | rs10264272               | #                   | 0          | 0.7        | 12.8       | 0          | 0          | 0.1        | Inactive                      |
| <b>*7</b>                                                                       | rs41303343               | Frameshift          | 0          | 0.4        | 10.2       | 0          | 0          | 0          | Not clear                     |
| <b>*8</b>                                                                       | rs55817950               | (R28C)*             | 0          | 0          | 0          | 0          | 0          | 0          | Decreased                     |

\*: Missense

#: Splicing defect
